# Supplementary material for: Multi-antenna spectrum sensing by exploiting spatio-temporal correlation
Source: Springer Nature journal article supplement (doi:10.1186/1687-6180-2014-160), 2014-11-06

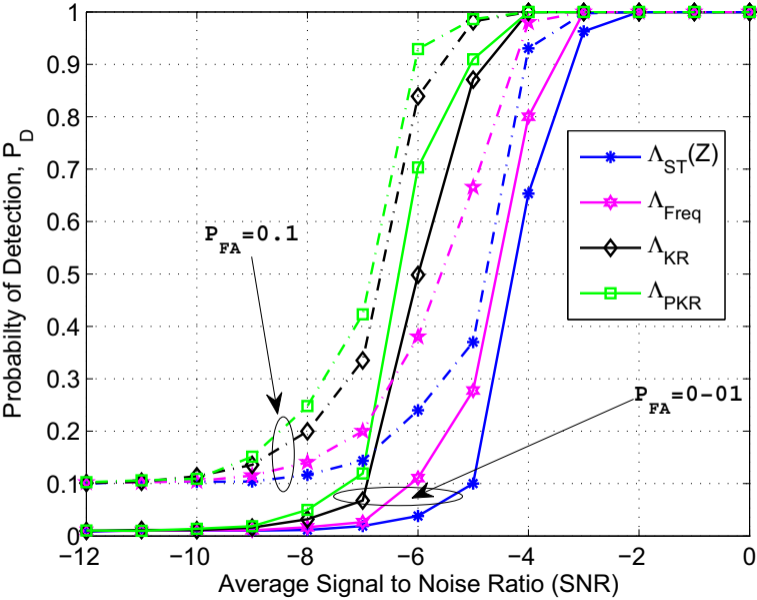

Supplement: 13634_2014_717_MOESM13_ESM.pdf [file 13634_2014_717_MOESM13_ESM.pdf]
